# Supplementary material for: On the Use of Persian Gum for the Development of Antiviral Edible Coatings against Murine Norovirus of Interest in Blueberries
Source: PubMed Central journal article supplement (PMC7827901; doi:10.3390/polym13020224), 2021-01-11
Supplement: polymers-13-00224-s001.pdf [file polymers-13-00224-s001.pdf]

## Supplementary Material

### On the use of Persian Gum for the development of antiviral edible coatings against Murine Norovirus of interest in blueberries

Niloufar Sharif<sup>1</sup>, Irene Falcó<sup>1,2</sup>, Antonio Martínez-Abad<sup>1</sup>, Gloria Sánchez<sup>1</sup>, Amparo López-Rubio<sup>1</sup>, María José Fabra<sup>1\*</sup>

Table S1. Zeta potential values of the FFD.

| <b>PG:G ratio</b> | <b>Zeta Potential (mV)</b> |
|-------------------|----------------------------|
| 100:0             | -13.7 (0.8)                |
| 75:25             | -8.3 (0.7)                 |
| 50:50             | -2.5 (0.3)                 |
| 25:75             | 1.0 (0.01)                 |
| 0:100             | 3.9 (0.1)                  |
